# Supplementary material for: Capacity of mesoporous bioactive glass nanoparticles to deliver therapeutic molecules
Source: Royal Society of Chemistry journal article supplement (doi:10.1039/c2nr31775c), 2012-01-01
Supplement: c2nr31775c.pdf [file c2nr31775c.pdf]

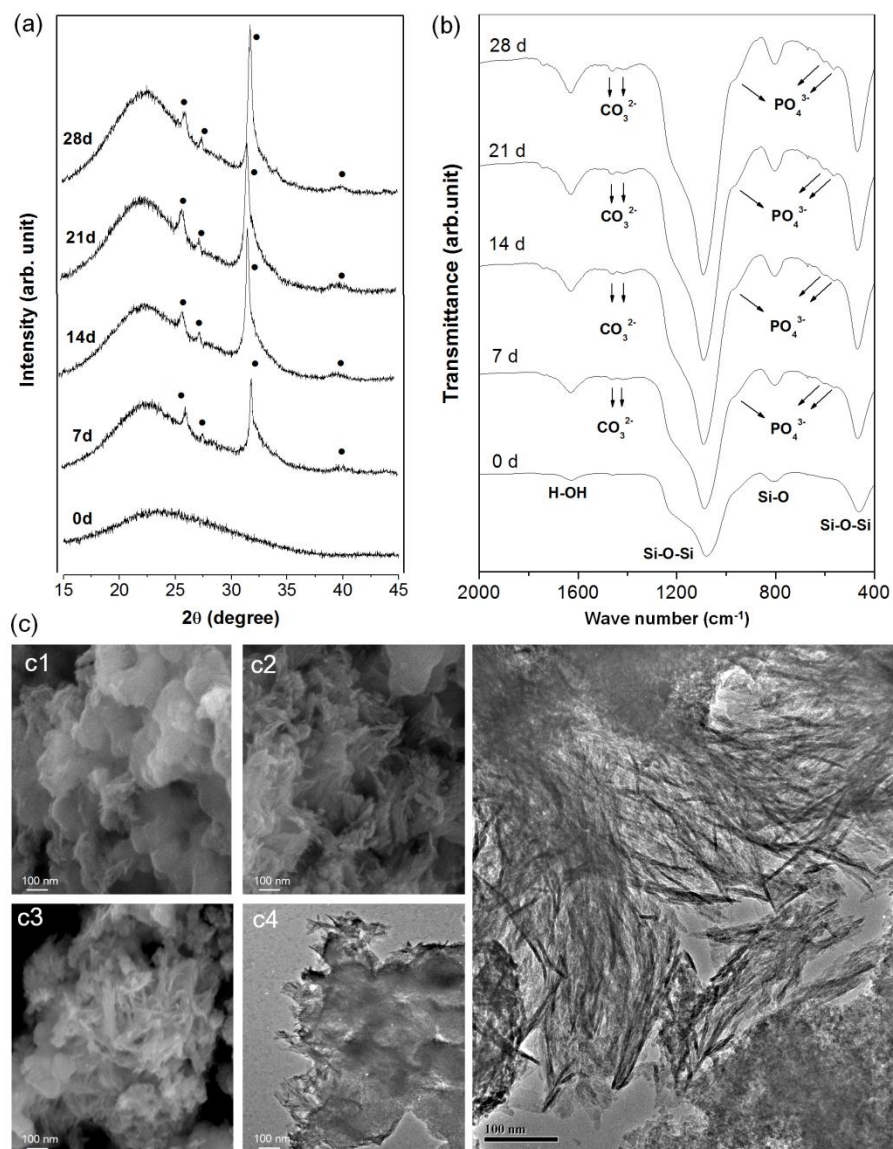

**Supplementary 1.** Assessments of hydroxyapatite-forming ability of the mesoporous BG nanoparticles (BGn2(A) shown representatively) after immersion in SBF for periods of up to 28 days and then observation of (a) phase change by XRD, (b) chemical bond structure by FT-IR, and (c) nano-morphology of the samples. Addition peaks typical of hydroxyapatite (with a main peak at  $2\theta = 32^\circ$ ) were well developed during immersion (a) from XRD patterns. FT-IR spectra showed the formation of bands related to carbonated hydroxyapatite ( $\text{PO}_4$  bands at 565 , 605 and  $964\text{ cm}^{-1}$  and  $\text{CO}_3$  bands at  $1420$  and  $1458\text{ cm}^{-1}$ ) after SBF immersion (b). SEM images revealed the precipitated nanocrystallites on the surface of nanoparticles as short as day 1 (c1), and the crystal formation was significant with

further incubation for 7 (c2) and 14 days (c3), totally changing the spherical morphology of the BGn2(A). TEM image supports the development of nanocrystallites on the surface of the nanoparticles at 1 (c4) and 7 days (c5).

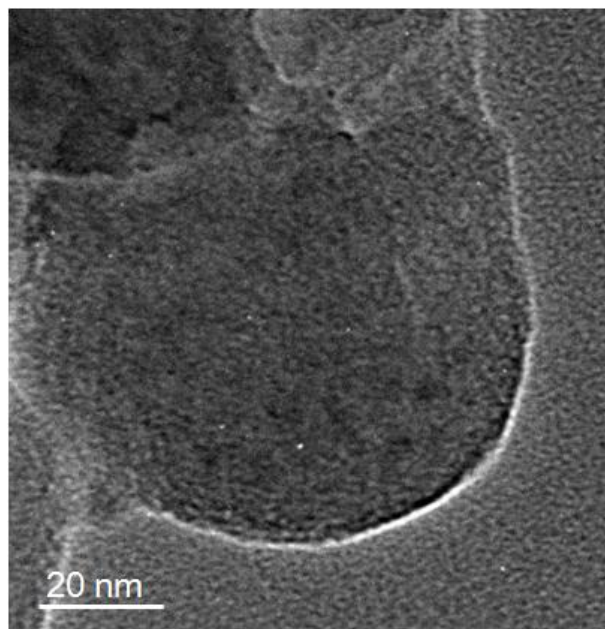

**Supplementary 2.** TEM image of ampicillin-loaded BGn2. Comparing this image with BGn2 (shown in Fig. 1b3) clarified the mesopores developed in the structure significantly disappeared.

**Supplementary 3.** Change in pore structure of the BG nanoparticles due to the ampicillin loading.

| Parameter                                 | BGn1(A) |       |         | BGn2(A) |       |         |
|-------------------------------------------|---------|-------|---------|---------|-------|---------|
|                                           | before  | after | %change | before  | after | %change |
| Pore size (nm)                            | 4.9     | 3.78  | 22.9    | 3.20    | 2.94  | 8.1     |
| Specific surface area (m <sup>2</sup> /g) | 54.0    | 42.9  | 20.5    | 830     | 487   | 41.3    |
| Specific pore volume (cm <sup>3</sup> /g) | 0.133   | 0.080 | 38.8    | 0.415   | 0.282 | 32.0    |
